# Supplementary material for: Spatial Narratives and Architectural Interventions: Analysing the Impact of Internal Partition Design on Visitor Experience at the Istanbul Archaeological Museum
Source: Research Square preprint supplement (doi:10.21203/rs.3.rs-7398314/v1), 2025-09-22
Supplement: Supplementary file 1 [file 8b12d4de322831ac6e3112c9.pdf]

## Paired t test informations

| Table Analysed                           | Col: Paired t test          |
|------------------------------------------|-----------------------------|
| Column B                                 | Connectivity (without wall) |
| vs.                                      | vs.                         |
| Column A                                 | Connectivity (with wall)    |
|                                          |                             |
| Wilcoxon matched-pairs signed rank test  |                             |
| P value                                  | <0.0001                     |
| Exact or approximate P value?            | Approximate                 |
| P value summary                          | ****                        |
| Significantly different (P < 0.05)?      | Yes                         |
| One- or two-tailed P value?              | Two-tailed                  |
| Sum of positive, negative ranks          | 412213 , -16988             |
| Sum of signed ranks (W)                  | 395225                      |
| Number of pairs                          | 935                         |
| Number of ties (ignored)                 | 9                           |
|                                          |                             |
| Median of differences                    |                             |
| Median                                   | 291.0                       |
|                                          |                             |
| How effective was the pairing?           |                             |
| rs (Spearman)                            | -0.1228                     |
| P value (one tailed)                     | <0.0001                     |
| P value summary                          | ****                        |
| Was the pairing significantly effective? | Yes                         |
